## Coding of Obesity-related Mortality Impacts Estimates of Obesity on U.S. Life Expectancy

Andrea M. Tilstra\*<sup>1,2,3</sup>, José Manuel Aburto<sup>1,2,4</sup>, Iliya Gutin<sup>5</sup>, Jennifer Beam Dowd<sup>1,2</sup>

<sup>1</sup>Leverhulme Centre of Demographic Science, Department of Sociology, University of Oxford, Oxford, UK

<sup>2</sup>Nuffield College, University of Oxford, Oxford, UK

<sup>3</sup>University of Colorado Population Center, Institute of Behavioral Science, University of Colorado Boulder, Boulder, CO, USA

<sup>4</sup>Interdisciplinary Centre on Population Dynamics, University of Southern Denmark

<sup>5</sup>University of Texas Population Center, University of Texas Austin, Austin, TX, USA

\*Corresponding Author:

Andrea M. Tilstra

Department of Sociology, University of Oxford  
42-43 Park End Street  
Oxford OX1 1JD  
United Kingdom

Andrea.tilstra@sociology.ox.ac.uk  
+44 7426 786201

1 Abstract

2

3 Background

4 High levels of obesity remain an important population health problem in the U.S. and a possible  
5 contributor to stalling life expectancy. However, reliable estimates of the contribution of obesity  
6 to mortality in the U.S. are lacking, because of inconsistent coding of obesity-related causes of  
7 death.

8

9 Methods

10 We compare five International Classification of Diseases version 10 (ICD-10) coding schemes  
11 for obesity-related mortality used in the literature and examine how the magnitude of obesity-  
12 related mortality burdens varies across different schemes. We use U.S. multiple cause of death  
13 data and population estimates for the Black, white, and Latino population in the years 2010,  
14 2015, and 2020. In sex- and race/ethnic-stratified analyses, we estimate the potential years of life  
15 expectancy gained if obesity-related mortality had not occurred as measured by each coding  
16 scheme.

17

18 Results

19 We estimate that obesity-related mortality contributes to up to 78 months (6.5 years) of lost U.S.  
20 life expectancy, though estimates range from as low as 0 months, with a median contribution  
21 across ICD-10 coding schemes of about 20 months (1.7 years). Despite substantial variation  
22 across coding schemes, obesity-related mortality consistently contributes more to life expectancy  
23 deficits for Black Americans compared to white and Latino Americans. Across all ICD-10

24 coding schemes, the age pattern of obesity follows a J-shaped curve, suggesting exponential  
25 increases in obesity-related mortality after age 25.

26

## 27 Conclusions

28 The estimation of the burden of obesity-related mortality on life expectancy in the United States  
29 varies widely depending on the causes of death used in analyses. This inconsistency may obscure  
30 our understanding of the contribution of obesity-related mortality to trends in life expectancy.  
31 We propose a standardization of the coding of obesity-related mortality for future studies and  
32 outline which causes should be included.

33

34 Keywords: obesity; mortality; International Classification of Disease (ICD); life expectancy;  
35 United States

36 Introduction

37

38 In 2018, an estimated 42.5% of the United States population had obesity (body mass index  
39 (BMI)  $\geq 30$ ), an increase from 30.5% in 2000. Over the same period, rates of severe obesity  
40 (BMI  $\geq 40$ ) nearly doubled to 9.2% (1). There are pronounced race/ethnic differences in  
41 American obesity rates, as evidenced by the 57% obesity rate among non-Hispanic Black women  
42 compared to 40% among non-Hispanic white women (1). While the obesity epidemic defies easy  
43 explanation, one hypothesis is that an increasingly obesogenic environment over past decades  
44 (e.g., increased accessibility of calorically-dense food and more sedentary lifestyles) has made  
45 maintaining a healthy body weight more challenging, in ways that are socially patterned (2).  
46 Consequently, the obesity epidemic may be contributing to alarming U.S. mortality and life  
47 expectancy trends (3–5), as well as racial disparities in these trends (6,7). Research also indicates  
48 that these trends may continue to worsen as younger cohorts are exposed to more time in the  
49 U.S. obesogenic environment (3,8).

50

51 Despite the increased prevalence of obesity in the United States and widespread recognition of  
52 its consequences for population health, we lack consensus on how to track and report its impact  
53 on key population health metrics such as mortality rates and life expectancy estimates. As argued  
54 in this paper, a key obstacle in obtaining such estimates is the absence of a standardized  
55 approach for measuring obesity-related mortality based on reporting standards in existing vital  
56 statistics data.

57

58 Currently, statistical approaches for estimating obesity-related mortality generally fall into one of  
59 two categories based on the data source used for analysis. One approach uses obesity prevalence  
60 and all-cause mortality to estimate obesity-attributable mortality fractions (OAMF) (9). To  
61 estimate this, researchers use nationally-representative survey data (e.g., National Health  
62 Interview Survey, National Health and Nutrition Examination Survey) to calculate the  
63 prevalence of obesity and the relative risk of premature mortality associated with obesity as  
64 compared to a lower weight status. The two are then combined to provide a counterfactual  
65 proportion of deaths attributable to obesity that could have otherwise been avoided if all adults  
66 were assigned to a lower weight status (10). There are different techniques to estimate OAMF,  
67 including the partially adjusted method and the weighted sum method (11,12). Yet, the OAMF  
68 approach is often limited in estimating an association between obesity and/or BMI at a given  
69 point in time and mortality many years later, as there are many possible sources of confounding  
70 that introduce substantial uncertainty in the meaning of a single measure of obesity (13–15).

71  
72 A second, more recent approach – which is the subject of this analysis – uses underlying and  
73 multiple cause of death mortality data to estimate obesity-related mortality rates (8,16–18).  
74 Because of the very strong and likely causal association between obesity and a broad variety of  
75 cardiometabolic conditions, many different causes of death are often categorized as obesity-  
76 related (9,19–23). Though categorizations from multiple cause of death data cannot definitively  
77 capture obesity-related mortality, they may be a better proxy for such deaths and provide more  
78 “direct individual-level evidence” given that they come from death certificates rather than  
79 OAMFs from survey data (16). These data are also valuable in highlighting the many co-morbid  
80 conditions that contribute to adult mortality, as the information provided by a single, underlying

81 cause may be insufficient (24–26). While the demographic analysis techniques used with  
82 population-level cause-specific mortality data are less varied across studies (e.g., estimation of  
83 age-standardized mortality rates), there is a clear lack of consistency in the classification of  
84 obesity- or metabolic-related causes of death. The relatively standardized statistical approaches  
85 with population-level mortality data warrant a standardized coding scheme for consistent and  
86 comparable estimates of obesity-related mortality across studies, time, and subpopulations of  
87 interest.

88  
89 The International Classification of Disease (ICD) lists obesity as an independent cause of death  
90 (ICD10: E65-E67), but researchers acknowledge that this coding is used too infrequently and  
91 underestimates the true mortality burden of obesity, as there are many other causes of death  
92 which are likely representative of obesity-related mortality, including hypertension and diabetes  
93 (27–29). Thus, studies using multiple cause of death data often include additional ICD codes in  
94 their obesity coding schemes. However, we contend that the inconsistent use of ICD codes across  
95 studies is a key limitation of this work as it leads to vastly different estimates of the contribution  
96 of obesity to U.S. mortality.

97  
98 In this paper, we test how different obesity-related ICD coding schemes equate to variation in the  
99 estimated of years of life expectancy in the U.S. lost due to obesity. We also show how these  
100 patterns differ by sex and race/ethnicity, given large disparities in obesity rates within the U.S.  
101 population. Finally, we identify critical flaws in commonly used obesity-related ICD coding  
102 schemes and propose best practices for standardizing. In turn, our systematic comparison of  
103 these different coding practices – both over time and by sex and race/ethnicity – helps

104 demonstrate the considerable variation in obesity’s impact over past decades and across groups.

105 Ultimately, we argue that greater standardization is vital for improving our knowledge of

106 population health trends in obesity-related mortality and its impact on life expectancy.

107

108

## 109 Data & Methods

110

### 111 *Data*

112 Data come from the publicly available United States mortality multiple cause of death files

113 provided by the Vital Statistics division of the National Center for Health Statistics (numerator)

114 and yearly population estimates from the Surveillance, Epidemiology, and End Results Program

115 (denominator) (30). We restrict data to U.S. residents in the years 2010, 2015, and 2020, and to

116 non-Hispanic white (white), non-Hispanic Black (Black), and Hispanic/Latino (Latino)

117 populations. Other race/ethnic groups were excluded due to issues with model instability from

118 small data counts. All analyses are sex- and race/ethnic-stratified.

119

### 120 *Coding Schemas*

121 We identify five coding schemes for obesity-related mortality. Three come from recent

122 publications: Masters et al. (8) (henceforth: Masters), Adair and Lopez (16) (henceforth: Adair),

123 and Acosta et al. (18) (henceforth: Acosta). The fourth comes from the Global Burden of Disease

124 (GBD) 2013 estimates of mortality attributable to high BMI (17), and the fifth coding scheme

125 uses only the ICD codes for obesity (E65-E67) as the underlying cause of mortality (UCOD).

126 Appendix A includes the ICD-10 codes for each coding scheme. Several differences across

127 coding schemes are worth noting. First, GBD and Acosta are the only two to include neoplasms.  
128 Acosta restricts to “obesity-related” neoplasms, but GBD codes are much more expansive (e.g.,  
129 leukemia). Second, Acosta and UCOD do not include any hypertension or heart disease causes,  
130 while the other three coding schemes do.

131

### 132 *Other Causes of Death*

133 To show the relative contribution of obesity-related deaths compared to other major causes of  
134 death shaping recent life expectancy trends in the United States, we code and analyze five major  
135 causes of mortality and one residual category. These are despair-related mortality (suicides,  
136 alcohol- and drug-related) (8), cancer deaths, deaths from infectious and parasitic diseases,  
137 deaths from respiratory diseases, and accidental deaths (excluding those related to despair). The  
138 ICD-10 codes used in each category are listed in Appendix B. All categories are mutually  
139 exclusive, such that if a cause of death was listed in an obesity scheme and in another category,  
140 its inclusion in the obesity category was prioritized. For example, the obesity-related neoplasms  
141 that were included in Acosta scheme were not included in cancer mortality for analyses of the  
142 Acosta scheme.

143

### 144 *Methods*

145 Lifetables were calculated by sex and racial/ethnic groups following standard demographic  
146 techniques (31). From these, life expectancy at birth was used as the main indicator of our  
147 analysis. Life expectancy is the average number of years a cohort of newborns is expected to live  
148 if they were to experience the mortality rates present in a given year throughout their lives. It is  
149 not a forecast or projection of any individual’s lifespan, but it accurately reflects mortality levels



150 of a population in a given year. Because life expectancy is not affected by population size or age-  
151 structures, it is a comparable indicator across populations and over time.

152  
153 To calculate the burden of obesity-related mortality on life expectancy in a comparable way  
154 across populations and schemes, we used cause-deleted life tables and calculated the potential  
155 years of life expectancy that would be gained if obesity-related deaths were avoided (31). This  
156 methodology has been used previously in similar studies and is similar to decomposition  
157 techniques used in demographic research (32).

158

## 159 Results

160

161 Figures 1 and 2 show the distribution of mortality across causes of death for the United States in  
162 2020 for females (Figure 1) and males (Figure 2). While the residual category consistently  
163 comprises the most deaths, despair-related mortality and accidents stand out as the key  
164 contributors of mortality at middle-ages. Despair-related deaths are especially pronounced  
165 among middle-aged U.S. men of all races/ethnicities. These figures show that the prevalence of  
166 obesity-related mortality increases with age. Under the UCOD scheme there are very few  
167 obesity-related deaths (less than 0.6%), across both sexes and all three race/ethnic categories.  
168 While under the GBD coding scheme it comprises a large proportion of deaths, from 28.5% for  
169 Latino males to 37.0% among Black females. Across all schemes, there is a higher proportion of  
170 obesity-related deaths for Black males and females than for white and Latino males and females,  
171 consistent with racial and ethnic disparities in obesity prevalence.

172

173 **Figure 1.** Cause of Death Structure over Age, Coding Scheme, and Race/Ethnicity, Females  
174 2020  
175

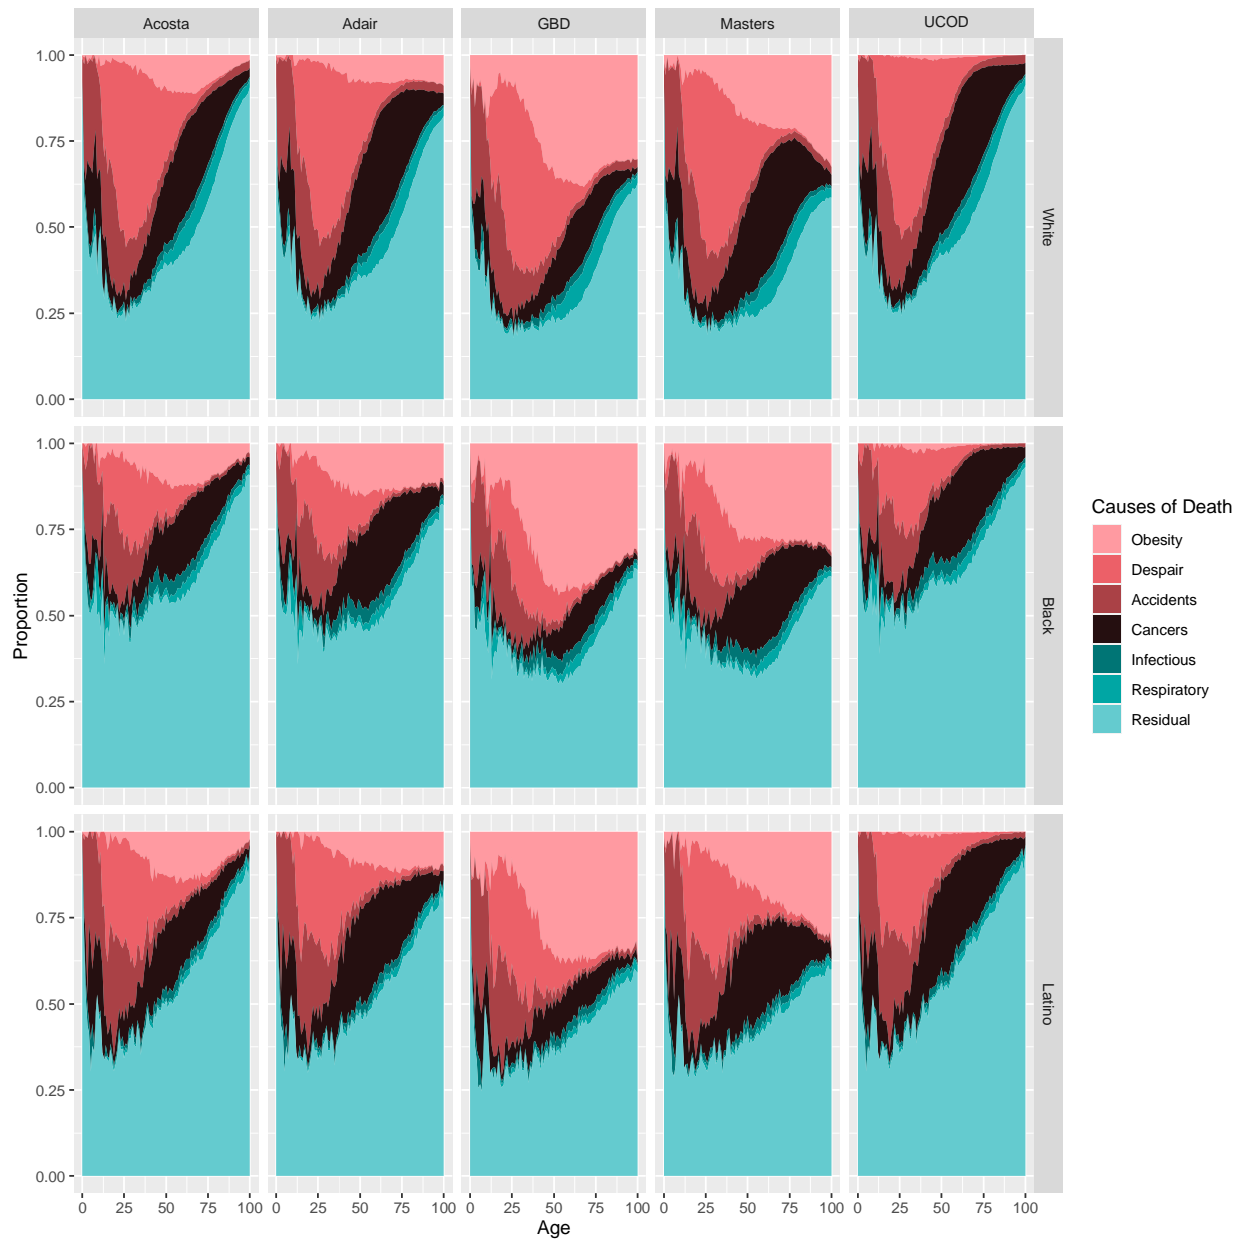

176  
177 Notes: Data come from the NVSS mortality data and the SEER population estimates.

178 **Figure 2.** Cause of Death Structure over Age, Coding Scheme, and Race/Ethnicity, Males 2020

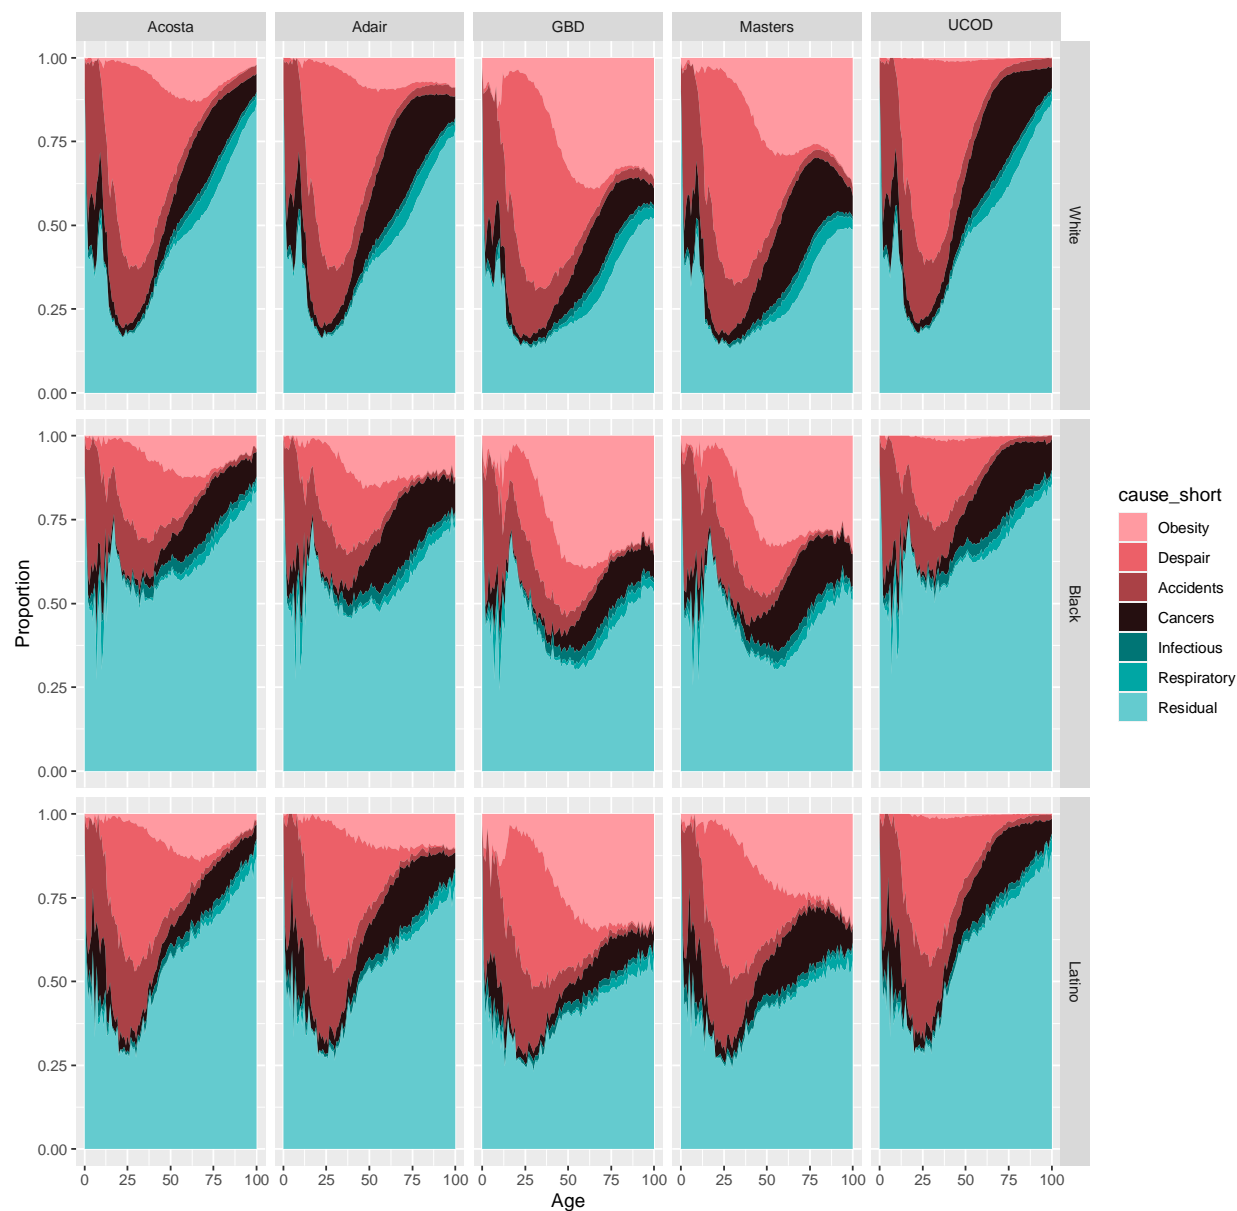

179  
180  
181

Notes: Data come from the NVSS mortality data and the SEER population estimates.

182 The age pattern of obesity-related mortality, shown in Figure 3, is relatively consistent across  
183 coding schemes. It is also consistent over time (as shown in Appendix C). The J-shaped curve  
184 suggests that obesity-related mortality increases exponentially with age after around age 25,  
185 showing that even at young ages (0-20), people are dying from causes deemed to be obesity-  
186 related, albeit at much smaller rates. The exception is, again, the UCOD scheme which shows  
187 little to no obesity-related deaths at young ages. This scheme also shows a stable distribution  
188 across ages, suggesting that the likelihood of a death being coded with obesity as the underlying  
189 cause does not fluctuate much across ages. At older ages, the Acosta scheme deviates from other  
190 trajectories, which may be indicative that it more accurately captures frailty or selection.

191  
192  
193

**Figure 3.** Age Pattern of Obesity-related Mortality across Schemas, 2020

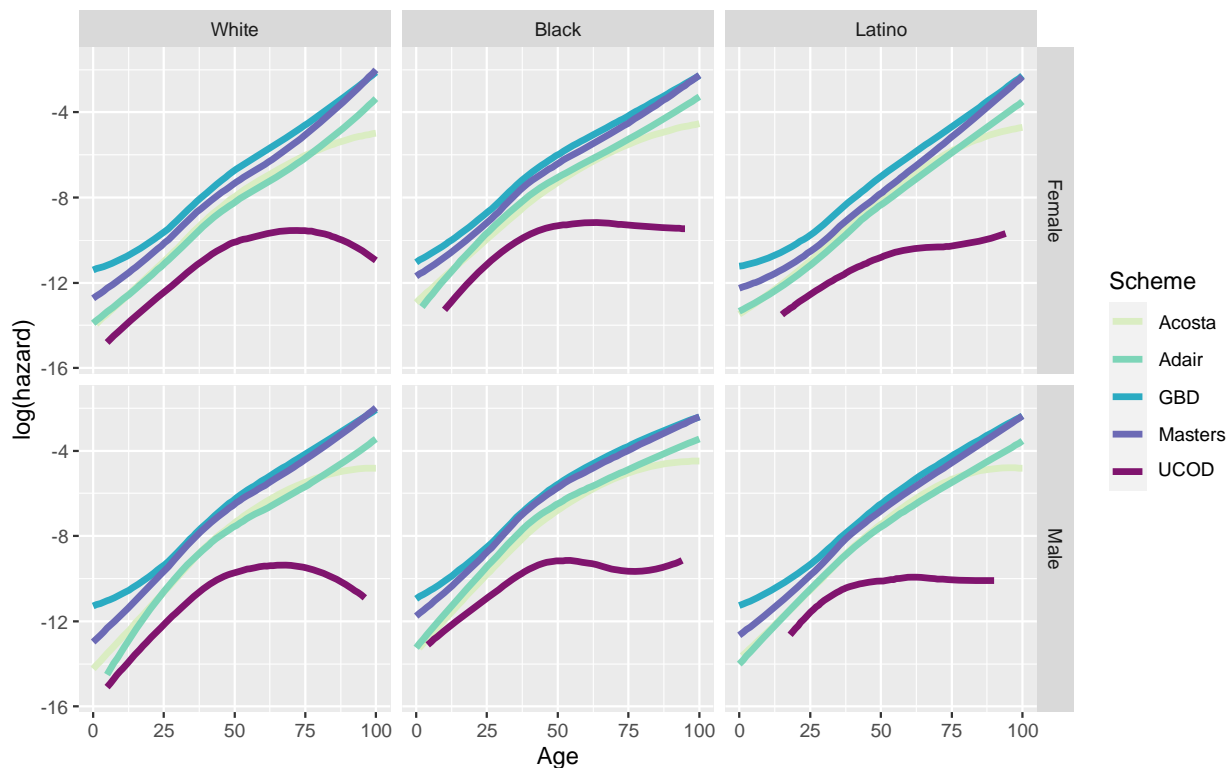

194  
195  
196  
197  
198

Notes: Data come from the NVSS mortality data and the SEER population estimates.

199 Table 1 provides estimates of life expectancy at birth ( $e_0$ ) for females and males in 2010, 2015,  
 200 and 2020. Consistent with estimates provided by the U.S. Vital Statistics (33), Black males have  
 201 the lowest life expectancy (67.79 years in 2020) and male and female Latinos have life  
 202 expectancy that is consistently higher than their white and Black counterparts. Additionally,  
 203 estimates of life expectancy dropped between 2015 and 2020 for all sex and race/ethnic groups,  
 204 except white women.

205  
 206

207 **Table 1.** Life Expectancy at Birth ( $e_0$ ) by Race/Ethnicity and Sex: 2010, 2015, and 2020

208

|               | <b>Female</b> |             |             | <b>Male</b> |             |             |
|---------------|---------------|-------------|-------------|-------------|-------------|-------------|
|               | <i>2010</i>   | <i>2015</i> | <i>2020</i> | <i>2010</i> | <i>2015</i> | <i>2020</i> |
| <b>White</b>  | 81.10         | 81.03       | 80.21       | 76.36       | 76.33       | 74.93       |
| <b>Black</b>  | 77.64         | 78.11       | 75.52       | 71.40       | 71.72       | 67.79       |
| <b>Latino</b> | 84.57         | 84.81       | 82.34       | 79.69       | 80.04       | 75.62       |

209 Notes: Data come from the NVSS mortality data and the SEER population estimates.

210  
 211

212 Figure 4 shows race/ethnic and sex differences in the contribution of obesity-related mortality to  
 213 life expectancy estimates in 2010, 2015, and 2020. The contribution of obesity-related causes to  
 214 estimates of life expectancy vary widely across coding schemes from 0 months (UCOD) to 80  
 215 months (GBD). Consistent across schemes is that obesity-related mortality contributed more to  
 216 losses in Black American life expectancy than white and Latino life expectancy. For instance, in  
 217 2020 the GBD coding scheme showed that obesity contributed 78 months to lost Black female  
 218 life expectancy, and 64 and 53 months to white and Latina females, respectively. In parallel,  
 219 eliminating obesity-related mortality under the GBD coding scheme would result in the largest  
 220 improvements in U.S. life expectancy. Yet, contributions of obesity-related mortality to life

221 expectancy losses for all schemes (except UCOD) exceed 10 months. Of note, contributions are  
 222 similar for 2010 and 2015, but lower in 2020; this may be a result of an increase in deaths from  
 223 COVID-19 during 2020.

224

225 **Figure 4.** Contribution of Obesity to Life Expectancy losses by Coding Schema: 2010, 2015, and  
 226 2020

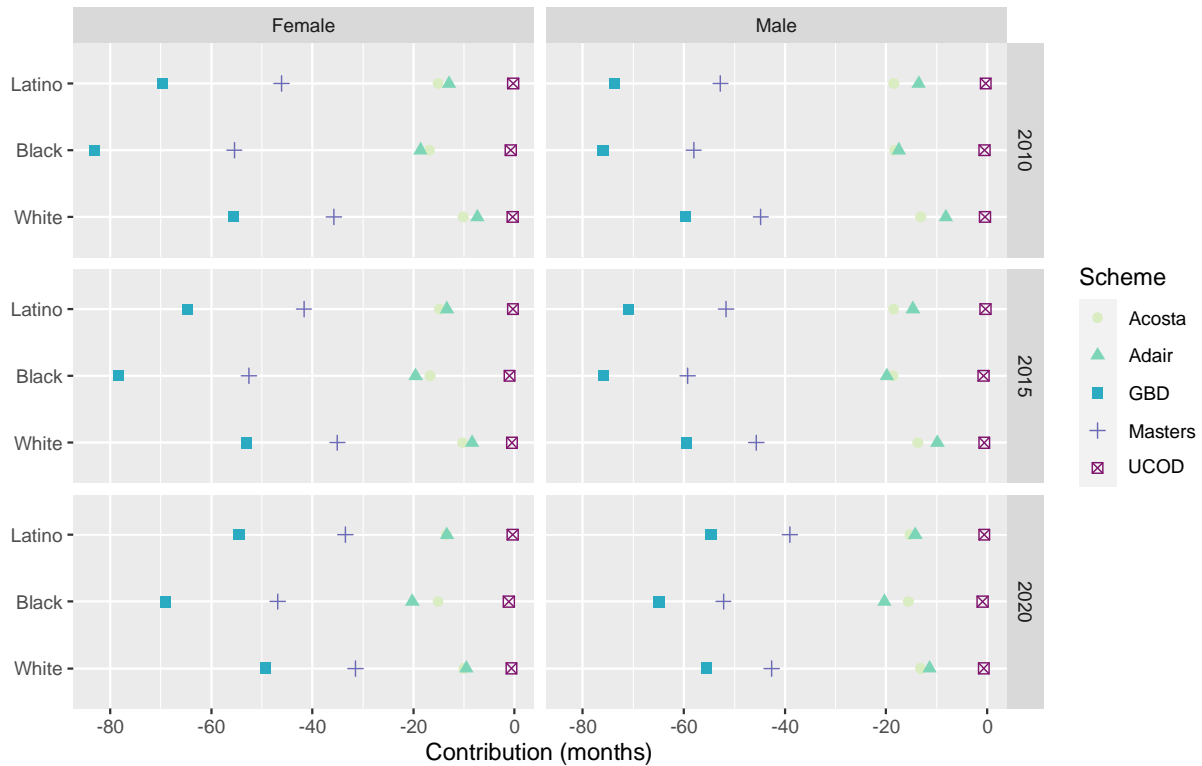

227  
 228 Notes: Data come from the NVSS mortality data and the SEER population estimates.

229

230

231

232

233 Discussion

234

235 The high and rising rates of obesity in the U.S. suggest that the effect of obesity on U.S. life  
 236 expectancy will continue to be significant. Understanding the contribution of obesity to stalls in  
 237 U.S. life expectancy and its deterioration relative to peer countries is an important area of

238 research (10,12,16,18). Thus, the measurement of obesity-related mortality is both substantively  
239 and theoretically important, but approaches have not been standardized up to now. Our results  
240 suggest several key takeaways for moving forward.

241  
242 First, we find that the elimination of obesity-related mortality would increase life expectancy for  
243 all Americans, regardless of the coding scheme used. While the effect size differs depending on  
244 the scheme, we show that if these causes were eliminated, life expectancy could improve by as  
245 much as 80 months, or 6.6 years. Second, we find that the elimination of obesity-related  
246 mortality would increase life expectancy more for Black Americans than for other racial/ethnic  
247 groups in the U.S. The contribution of obesity-related mortality is also greater at younger ages  
248 for Black Americans, compared to their white and Latino counterparts. This is likely a result of  
249 complex social determinants of body weight, which particularly disadvantage the Black  
250 population in early life and throughout the life course (34–37).

251  
252 This study has important implications for the measurement of obesity-related mortality. First, we  
253 recommend that UCOD, or obesity as the single underlying cause of death, should not be used  
254 for estimating the contribution of obesity to mortality in a population. It is an overly narrow  
255 definition of obesity-related deaths, which necessitates that obesity is listed as not only a cause of  
256 death on the death certificate, but as the underlying cause. Unfortunately, this strict criterion is  
257 potentially subject to the biases/assumptions of the person coding the cause of death (27,29),  
258 leading to the identification of less than a fifth of all deaths where obesity is implicated (24). For  
259 instance, a cross-national comparison of obesity-related mortality suggests that physicians'  
260 propensity for reporting obesity as an underlying cause on death certificates might vary due to

261 their “sensitiv[ity] to abnormally high BMIs,” in reference to national differences in the  
262 prevalence of obesity and thus expectations about the *average* BMI and body size (24). Within  
263 the context of the United States, reporting practices may be similarly influenced by sex and  
264 racial/ethnic differences surrounding body size norms and health (38–40), as well as sex and  
265 racial/ethnic biases in how medical practitioners view their patients and health (41–43). These  
266 factors may in turn influence perceptions about obesity’s role for individuals’ health (44,45), and  
267 thus its contribution to their death. Thus, it is evident that existing coding practices for obesity as  
268 an underlying cause are not only too limited in identifying obesity-related comorbidity, but also  
269 likely more susceptible to the subjective preferences and beliefs of the individual evaluating the  
270 reasons underlying death.

271  
272 Conversely, the GBD coding scheme is likely too broad. It includes several types of cancers  
273 (e.g., leukemia and ovarian cancer) which, while linked with obesity, are likely not a direct result  
274 of obesity. We suggest that future measurements of obesity-related mortality consider adopting  
275 the Adair coding scheme. This scheme, along with the Acosta scheme, provide moderate yet  
276 plausible estimates for the contributions of obesity-related mortality for life expectancy. Yet  
277 unlike Acosta and Masters schemes, it includes causes of death that are more likely to be a direct  
278 result of obesity: obesity (included in Adair, Acosta, Masters, UCOD), diabetes (Adair, Acosta,  
279 GBD, Masters), hypertension (Adair, Masters), chronic kidney disease (Adair, GBD), and  
280 lipidemia-related causes (Adair, GBD). The exact ICD-10 codes used the Adair scheme, and all  
281 other schemes, are provided in Appendix A. It is inevitable that there is some margin of error in  
282 how well each of these causes of deaths can be directly attributable to obesity, but past studies  
283 clearly demonstrate where and when this association is stronger or weaker (9,17,21,46). Future



284 research might consider developing a relative risk threshold for the association between obesity  
285 and specific causes of death, to use direct epidemiologic evidence to determine which causes to  
286 include. For now, the codes used by Adair and Lopez strike the best balance of including  
287 conditions most strongly associated with obesity (16).

288

289 Second, the age pattern of mortality across coding schemes emphasizes the importance of  
290 considering when in the life course obesity can plausibly be considered a contributing cause of  
291 death. Obesity has relatively immediate health consequences, mostly reflected in its association  
292 with elevated biomarkers for poor cardiovascular and metabolic health (47–49), as well as its  
293 broad pro-inflammatory effect (50,51), which is implicated in numerous chronic conditions.  
294 However, the health consequences that might increase the risk of mortality are typically  
295 cumulative in nature – especially with respect to chronic cardiometabolic disease – and thus  
296 unlikely to be more directly implicated until later in life, when adults have lived with one or  
297 more chronic diseases for an extended period of time (52–54). Moreover, some proportion of  
298 obesity-related deaths are likely misclassified when using multiple cause of death data. This  
299 misclassification bias may be more salient at younger ages where even causes of death that are  
300 very strongly linked to obesity (e.g., diabetes, heart disease) have a more complex etiology.  
301 Thus, it is unlikely that young individuals are dying directly of obesity-related mortality. To  
302 account for this, we suggest that researchers consider restricting to ages 25 and older when  
303 estimating obesity-related mortality research. This is particularly important for research  
304 estimating the consequences of obesity-related mortality on life expectancy which, unless  
305 specified otherwise, considers all ages in the estimation.

306

307

308 *Limitations*

309 As noted earlier, the only currently-available ICD coding options that *specifically* implicates  
310 obesity as the underlying cause of death are the E66-67 codes, which likely heavily undercount  
311 obesity-related deaths – as demonstrated in this analysis and suggested in earlier work (16,27–  
312 29). Thus, it is inevitable that at least some proportion of the deaths in each scheme are not due  
313 to obesity, but instead a function of other lifestyle and health factors, such as smoking (17). It is  
314 difficult to say whether the estimates presented by different coding schemes are liberal or  
315 conservative, as any “overestimation” noted above may be balanced out by “underestimation” in  
316 obesity’s association with numerous other causes of death not included in the schemes (e.g.,  
317 infectious disease [(24)]).

318

319 It is worth reiterating that the consequences of obesity for mortality can be estimated with both  
320 population-level data and demographic techniques, as is shown here, or with obesity-attributable  
321 mortality functions (OAMF). OAMFs, while useful because they estimate the direct relationship  
322 between obesity and mortality, are flawed because they estimate population-level obesity-related  
323 mortality using only a sample of the population, whose obesity was estimated at a time point  
324 preceding their mortality. Additionally, there is some evidence that the BMI cutoffs for obesity  
325 are perhaps not the same across all sex and race/ethnic groups, with a weaker association  
326 between high BMI and mortality for non-Hispanic Black and Hispanic men (55–58). In turn,  
327 there may be nonnegligible variation in how accurately multiple cause of death coding schemes  
328 capture obesity-related mortality (i.e., overestimation or underestimation) across different  
329 subpopulations. However, studies are largely equivocal in reaching consensus on the

330 (in)appropriateness of traditional BMI categories across the population and how obesity is  
331 defined, so it is unclear how exactly this might affect the estimates presented in our analysis.

332

333

### 334 Conclusions

335

336 This paper fills an important gap in obesity and mortality research by demonstrating the  
337 consequences of different coding schemes for estimates of life years lost due to obesity-related  
338 mortality. The approach of examining causes of death where obesity is not explicitly the  
339 underlying cause mirrors efforts to estimate the “true” burden of mortality associated with other  
340 risk factors for disease, like smoking (59). Indeed, we argue that researchers should be aware of  
341 the broad range of plausible estimates for obesity-related mortality and resulting deficits in life  
342 expectancy, as a single estimate is likely to be biased due to researchers’ assumptions about what  
343 constitutes an obesity-related cause of death. In light of the continuing obesity epidemic in the  
344 United States – with some projections estimating that half of the population will have obesity by  
345 the end of the decade (60) – it is critical to have consensus on the definition of obesity-related  
346 mortality to produce consistent estimates of its consequences for mortality.

347

348

349

350 **Declarations.**

351 *Ethics approval and consent to participate*

352 Not applicable.

353

354 *Consent for publication*

355 Not applicable.

356

357 *Availability of data and materials*

358 The datasets analyzed in this current study are available at NCHS,

359 ([https://www.cdc.gov/nchs/data\\_access/vitalstatsonline.htm](https://www.cdc.gov/nchs/data_access/vitalstatsonline.htm)) and SEER,

360 (<https://seer.cancer.gov/data-software/uspopulations.html>).

361

362 *Competing interests*

363 The authors declare that they have no competing interests.

364

365 *Funding*

366 British Academy's Newton International Fellowship grant NIFBA19/190679 (JMA)

367 Rockwool Foundation's Excess Deaths grant (JMA)

368 Leverhulme Trust Large Centre Grant (JMA, AMT, JBD)

369 European Research Council grant ERC-2021-CoG-101002587 (JBD, AMT).

370

371

372

373

374 *Authors contributions:*

375 Conceptualization: AMT

376 Data curation: AMT

377 Formal analysis: AMT, JMA

378 Methodology: AMT, JMA, JBD

379 Software: AMT, JMA

380 Visualization: AMT, JMA, IG, JBD

381 Writing – original draft: AMT, IG

382 Writing – review & editing: AMT, JMA, IG, JBD

383

384 *Acknowledgements*

385 We thank the Health Inequality Working Group at the Leverhulme Centre for Demographic

386 Science for their insightful comments on the manuscript.

## References

1. Hales CM, Carroll MD, Fryar CD, Ogden CL. Prevalence of Obesity and Severe Obesity Among Adults: United States, 2017-2018. *NCHS Data Brief*. 2020 Feb;(360):1–8.
2. Adler NE, Stewart J. Reducing Obesity: Motivating Action While Not Blaming the Victim. *Milbank Q*. 2009 Mar;87(1):49–70.
3. Olshansky SJ, Passaro DJ, Hershow RC, Layden J, Carnes BA, Brody J, et al. A Potential Decline in Life Expectancy in the United States in the 21st Century. *N Engl J Med*. 2005 Mar 17;352(11):1138–45.
4. Preston SH, Stokes A, Mehta NK, Cao B. Projecting the Effect of Changes in Smoking and Obesity on Future Life Expectancy in the United States. *Demography*. 2014 Feb 1;51(1):27–49.
5. Preston SH, Vierboom YC, Stokes A. The role of obesity in exceptionally slow US mortality improvement. *Proc Natl Acad Sci*. 2018 Jan 30;115(5):957–61.
6. Elo IT, Mehta N, Preston S. The Contribution of Weight Status to Black-White Differences in Mortality. *Biodemography Soc Biol*. 2017 Jul 3;63(3):206–20.
7. Frisco ML, Van Hook J, Hummer RA. Would the elimination of obesity and smoking reduce U.S. racial/ethnic/nativity disparities in total and healthy life expectancy? *SSM - Popul Health*. 2019 Apr;7:100374.
8. Masters RK, Tilstra AM, Simon DH. Explaining recent mortality trends among younger and middle-aged White Americans. *Int J Epidemiol*. 2018 Feb 1;47(1):81–8.
9. Flegal KM, Graubard BI, Williamson DF, Gail MH. Cause-Specific Excess Deaths Associated With Underweight, Overweight, and Obesity. *JAMA*. 2007 Nov 7;298(17):2028.
10. Preston SH, Stokes A. Contribution of Obesity to International Differences in Life Expectancy. *Am J Public Health*. 2011 Nov;101(11):2137–43.
11. Vidra N, Bijlsma M, Janssen F. Impact of Different Estimation Methods on Obesity-Attributable Mortality Levels and Trends: The Case of The Netherlands. *Int J Environ Res Public Health*. 2018 Sep 29;15(10):2146.
12. Vidra N, Trias-Llimós S, Janssen F. Impact of obesity on life expectancy among different European countries: secondary analysis of population-level data over the 1975–2012 period. *BMJ Open*. 2019 Jul;9(7):e028086.
13. Stokes A, Preston SH. How Dangerous Is Obesity? Issues in Measurement and Interpretation: How Dangerous Is Obesity? Issues in Measurement and Interpretation. *Popul Dev Rev*. 2016 Dec;42(4):595–614.

14. Stokes A, Preston SH. Revealing the burden of obesity using weight histories. *Proc Natl Acad Sci*. 2016 Jan 19;113(3):572–7.
15. Berry KM, Garcia S, Warren JR, Stokes AC. Association of Weight at Different Ages and All-Cause Mortality Among Older Adults in the US. *J Aging Health*. 2022 Feb 26;089826432110597.
16. Adair T, Lopez AD. The role of overweight and obesity in adverse cardiovascular disease mortality trends: an analysis of multiple cause of death data from Australia and the USA. *BMC Med*. 2020 Dec;18(1):199.
17. Di Angelantonio E, Bhupathiraju SN, Wormser D, Gao P, Kaptoge S, de Gonzalez AB, et al. Body-mass index and all-cause mortality: individual-participant-data meta-analysis of 239 prospective studies in four continents. *The Lancet*. 2016 Aug;388(10046):776–86.
18. Acosta E, Mehta N, Myrskylä M, Ebeling M. Cardiovascular mortality gap between the US and other high life expectancy countries in 2000-2016. *J Gerontol Ser B*. 2022 Feb 23;gbac032.
19. Expert Panel Members, Jensen MD, Ryan DH, Donato KA, Apovian CM, Ard JD, et al. Executive summary: Guidelines (2013) for the management of overweight and obesity in adults: A Report of the American College of Cardiology/American Heart Association Task Force on Practice Guidelines and The Obesity Society Published by The O. Obesity. 2014 Jul;22(S2):S5–39.
20. Batty GD, Shipley MJ, Jarrett RJ, Breeze E, Marmot MG, Smith GD. Obesity and overweight in relation to organ-specific cancer mortality in London (UK): findings from the original Whitehall study. *Int J Obes*. 2005 Oct;29(10):1267–74.
21. Bhaskaran K, Douglas I, Forbes H, dos-Santos-Silva I, Leon DA, Smeeth L. Body-mass index and risk of 22 specific cancers: a population-based cohort study of 5.24 million UK adults. *The Lancet*. 2014 Aug;384(9945):755–65.
22. Censin JC, Peters SAE, Bovijn J, Ferreira T, Pulit SL, Mägi R, et al. Causal relationships between obesity and the leading causes of death in women and men. *Cotsapas C*, editor. *PLOS Genet*. 2019 Oct 24;15(10):e1008405.
23. Clinical Guidelines on the Identification, Evaluation, and Treatment of Overweight and Obesity in Adults--The Evidence Report. National Institutes of Health. *Obes Res*. 1998 Sep;6 Suppl 2:51S-209S.
24. Barbieri M, Désesquelles A, Egidi V, Demuru E, Frova L, Meslé F, et al. Obesity-related mortality in France, Italy, and the United States: a comparison using multiple cause-of-death analysis. *Int J Public Health*. 2017 Jul;62(6):623–9.
25. Désesquelles AF, Salvatore MA, Pappagallo M, Frova L, Pace M, Meslé F, et al. Analysing Multiple Causes of Death: Which Methods For Which Data? An Application to the Cancer-

- Related Mortality in France and Italy. *Eur J Popul Rev Eur Démographie*. 2012 Nov;28(4):467–98.
26. Désesquelles A, Demuru E, Egidi V, Frova L, Meslé F, Pappagallo M, et al. Cause-specific mortality analysis: Is the underlying cause of death sufficient? *Rev QueteletQuetelet J*. 2014;2(1):119–35.
  27. Duncan M, Griffith M, Rutter H, Goldacre MJ. Certification of obesity as a cause of death in England 1979-2006. *Eur J Public Health*. 2010 Dec 1;20(6):671–5.
  28. Fryer E, Roberts ISD, Sheppard MN, Verrill C. Postmortem examination in the morbidly obese. *Histopathology*. 2014 Jan;64(2):200–10.
  29. McCleskey BC, Davis GG, Dye DW. Correcting the Count: Improving Vital Statistics Data Regarding Deaths Related to Obesity. *J Forensic Sci*. 2018 Jul;63(4):1155–9.
  30. Surveillance, Epidemiology, and End Results (SEER) Program Populations (1969-2016) [Internet]. National Cancer Institute, DCCPS, Surveillance Research Program; Available from: [www.seer.cancer.gov/popdata](http://www.seer.cancer.gov/popdata)
  31. Preston SH, Heuveline P, Guillot M. *Demography: measuring and modeling population processes*. Malden, MA: Blackwell Publishers; 2001. 291 p.
  32. Beltrán-Sánchez H. Avoidable Mortality. In: Rogers RG, Crimmins EM, editors. *International Handbook of Adult Mortality* [Internet]. Dordrecht: Springer Netherlands; 2011 [cited 2021 Dec 28]. p. 491–508. (*International Handbooks of Population*; vol. 2). Available from: [http://link.springer.com/10.1007/978-90-481-9996-9\\_23](http://link.springer.com/10.1007/978-90-481-9996-9_23)
  33. Arias E, Betzaida T-V, Ahmad F, Kochanek K. Provisional Life Expectancy Estimates for 2020 [Internet]. National Center for Health Statistics (U.S.); 2021 Jul [cited 2022 Feb 15]. Available from: <https://stacks.cdc.gov/view/cdc/107201>
  34. Bleich SN, Thorpe RJ, Sharif-Harris H, Fesahazion R, LaVeist TA. Social context explains race disparities in obesity among women. *J Epidemiol Community Health*. 2010 May 1;64(5):465–9.
  35. Isong IA, Rao SR, Bind M-A, Avendaño M, Kawachi I, Richmond TK. Racial and Ethnic Disparities in Early Childhood Obesity. *Pediatrics*. 2018 Jan 1;141(1):e20170865.
  36. Krueger PM, Reither EN. Mind the Gap: Race/Ethnic and Socioeconomic Disparities in Obesity. *Curr Diab Rep*. 2015 Nov;15(11):95.
  37. Krueger PM, Coleman-Minahan K, Rooks RN. Race/ethnicity, nativity and trends in BMI among U.S. adults: Race/Ethnicity, Nativity, and Trends in BMI. *Obesity*. 2014 Jul;22(7):1739–46.
  38. Kronenfeld LW, Reba-Harrelson L, Von Holle A, Reyes ML, Bulik CM. Ethnic and racial differences in body size perception and satisfaction. *Body Image*. 2010 Mar;7(2):131–6.



39. Pickett S, Peters RM. Beliefs About Personal Weight Among African American Women. *Clin Nurs Res*. 2017 Apr;26(2):191–204.
40. Robinson SA, Webb JB, Butler-Ajibade PT. Body Image and Modifiable Weight Control Behaviors Among Black Females: A Review of the Literature. *Obesity*. 2012 Feb;20(2):241–52.
41. Bean MG, Stone J, Moskowitz GB, Badger TA, Focella ES. Evidence of Nonconscious Stereotyping of Hispanic Patients by Nursing and Medical Students. *Nurs Res*. 2013 Sep;62(5):362–7.
42. Cooper LA, Roter DL, Carson KA, Beach MC, Sabin JA, Greenwald AG, et al. The Associations of Clinicians' Implicit Attitudes About Race With Medical Visit Communication and Patient Ratings of Interpersonal Care. *Am J Public Health*. 2012 May;102(5):979–87.
43. Moskowitz GB, Stone J, Childs A. Implicit Stereotyping and Medical Decisions: Unconscious Stereotype Activation in Practitioners' Thoughts About African Americans. *Am J Public Health*. 2012 May;102(5):996–1001.
44. Bleich SN, Simon AE, Cooper LA. Impact of Patient-Doctor Race Concordance on Rates of Weight-Related Counseling in Visits by Black and White Obese Individuals. *Obesity*. 2012 Mar;20(3):562–70.
45. Lewis KH, Gudzone KA, Fischer H, Yamamoto A, Young DR. Racial and ethnic minority patients report different weight-related care experiences than non-Hispanic Whites. *Prev Med Rep*. 2016 Dec;4:296–302.
46. Prospective Studies Collaboration. Body-mass index and cause-specific mortality in 900 000 adults: collaborative analyses of 57 prospective studies. *The Lancet*. 2009 Mar;373(9669):1083–96.
47. Cercato C, Fonseca FA. Cardiovascular risk and obesity. *Diabetol Metab Syndr*. 2019 Dec;11(1):74.
48. Han TS, Lean ME. A clinical perspective of obesity, metabolic syndrome and cardiovascular disease. *JRSM Cardiovasc Dis*. 2016 Jan 1;5:204800401663337.
49. Powell-Wiley TM, Poirier P, Burke LE, Després J-P, Gordon-Larsen P, Lavie CJ, et al. Obesity and Cardiovascular Disease: A Scientific Statement From the American Heart Association. *Circulation [Internet]*. 2021 May 25 [cited 2022 Feb 17];143(21). Available from: <https://www.ahajournals.org/doi/10.1161/CIR.0000000000000973>
50. Ferrante AW. Obesity-induced inflammation: a metabolic dialogue in the language of inflammation. *J Intern Med*. 2007 Oct;262(4):408–14.

51. Rodríguez-Hernández H, Simental-Mendía LE, Rodríguez-Ramírez G, Reyes-Romero MA. Obesity and Inflammation: Epidemiology, Risk Factors, and Markers of Inflammation. *Int J Endocrinol*. 2013;2013:1–11.
52. Daniels SR. The Consequences of Childhood Overweight and Obesity. *Future Child*. 2006;16(1):47–67.
53. Ferraro KF, Kelley-Moore JA. Cumulative Disadvantage and Health: Long-Term Consequences of Obesity? *Am Sociol Rev*. 2003 Oct;68(5):707–29.
54. Hu FB, Willett WC, Stampfer MJ, Spiegelman D, Colditz GA. CALCULATING DEATHS ATTRIBUTABLE TO OBESITY. *Am J Public Health*. 2005 Jun;95(6):932–932.
55. Cohen SS, Signorello LB, Cope EL, McLaughlin JK, Hargreaves MK, Zheng W, et al. Obesity and All-Cause Mortality Among Black Adults and White Adults. *Am J Epidemiol*. 2012 Sep 1;176(5):431–42.
56. Fontaine KR, McCubrey R, Mehta T, Pajewski NM, Keith SW, Bangalore SS, et al. Body mass index and mortality rate among Hispanic adults: a pooled analysis of multiple epidemiologic data sets. *Int J Obes*. 2012 Aug;36(8):1121–6.
57. Jackson CL, Wang N-Y, Yeh H-C, Szklo M, Dray-Spira R, Brancati FL. Body-mass index and mortality risk in US Blacks compared to Whites: Body Mass Index and Mortality among Blacks and Whites. *Obesity*. 2014 Mar;22(3):842–51.
58. Patel AV, Hildebrand JS, Gapstur SM. Body Mass Index and All-Cause Mortality in a Large Prospective Cohort of White and Black U.S. Adults. Forloni G, editor. *PLoS ONE*. 2014 Oct 8;9(10):e109153.
59. Lariscy JT. Smoking-attributable mortality by cause of death in the United States: An indirect approach. *SSM - Popul Health*. 2019 Apr;7:100349.
60. Finkelstein EA, Khavjou OA, Thompson H, Trogon JG, Pan L, Sherry B, et al. Obesity and Severe Obesity Forecasts Through 2030. *Am J Prev Med*. 2012 Jun;42(6):563–70.
